# Supplementary material for: Distribution, composition and functions of gelatinous tissues in deep-sea fishes
Source: PubMed Central journal article supplement (PMC5750012; doi:10.1098/rsos.171063), 2017-12-06
Supplement: rsos171063supp1.pdf [file rsos171063supp1.pdf]

## Distribution, composition, and functions of gelatinous tissues in deep-sea fishes

Gerringer, Mackenzie E., Drazen, Jeffrey C., Linley, Thomas D., Summers, Adam P., Jamieson, Alan J., Yancey, Paul H.

**Supplementary Table 1.** Specimen information for gelatinous tissue samples tested. *N. kermadecensis* specimens were collected by free-vehicle trap (described Jamieson et al., 2013). Other specimens were collected by trawl (Drazen et al. 2015). Capture depth in metres. Collection dates noted. Standard length (SL) and Total length (TL) presented in centimetres, mass in grams.

| Family         | Species                          | Depth                | Date     | SL      | TL   | Mass    | Sex |
|----------------|----------------------------------|----------------------|----------|---------|------|---------|-----|
| Liparidae      | <i>Careproctus cypselurus</i>    | 1000                 | 4.8.09   |         | 17.8 | 47.8    | M   |
|                |                                  |                      |          |         |      |         |     |
|                | <i>Careproctus melanurus</i>     | 750                  | 10.2.09  | 15.5    |      | 24.47   | F   |
|                |                                  | 750                  | 10.2.09  | 13.7    | 15.2 | 36.46   | F   |
|                | <i>Notoliparis kermadecensis</i> | 1000                 | 4.8.09   |         | 25.6 | 193.2   | F   |
|                |                                  | 7000                 | 11.29.11 | 24.5    |      |         |     |
|                |                                  | 7000                 | 11.29.11 | 22.9    |      |         | F   |
|                |                                  | 7200                 | 5.4.14   | 25.9    | 28   | 230     | F   |
|                |                                  | 7392                 | 5.2.14   | 16.7    | 18.5 | 76      | M   |
| Ophidiidae     | <i>Spectrunculus grandis</i>     | 7515                 | 5.3.14   | 20.9    | 22.9 | 104     | F   |
|                |                                  | 2000                 | 10.9.09  | 141     | 146  | 17463.3 |     |
|                |                                  | 4149                 | 4.20.14  | 70      | 73.8 | 2128    | F   |
| Pleuronectidae | <i>Embassichthys bathybius</i>   | 1000                 | 10.1.09  | 32.4    | 37.4 | 627.4   | M   |
|                |                                  | 1000                 | 10.10.09 | 31.7    | 35   | 735.1   | F   |
|                |                                  | 1000                 | 10.11.09 | 37.5    | 41.4 | 880.3   | F   |
|                |                                  | 1000                 | 10.11.09 | 30.2    | 33.7 | 537.4   |     |
|                | <i>Microstomus pacificus</i>     | 1000                 | 10.1.09  | 46.6    | 50.4 | 1342.3  | F   |
|                |                                  | 1000                 | 10.1.09  | 40.3    | 46.2 | 1127.1  | F   |
|                |                                  | 1000                 | 10.1.09  | 43.7    | 48.5 | 1224.8  | F   |
| Zoarcidae      | <i>Bothrocara brunneum</i>       | 1000                 | 10.11.09 | 51      | 52.9 | 707     | M   |
|                |                                  | 2000                 | 4.13.09  | 57.7    | 59.3 | 890.1   | F   |
|                |                                  | 2000                 | 4.13.09  |         | 59.5 | 779.7   | F   |
|                | <i>Pachycara karenae</i>         | 3000                 | 10.8.09  | 35.6    | 37.4 | 503.6   | F   |
|                |                                  | 3000                 | 10.8.09  | 34.7    | 36.6 | 450.8   | M   |
|                |                                  | 3000                 | 10.8.09  | 37.7    | 38.5 | 501.6   | F   |
|                |                                  | <i>Pyrolycus</i> sp. | 4817     | 4.16.14 | 42   | 43.4    | 508 |
